# Supplementary material
Source: PubMed Central journal article supplement (PMC2919109)
Supplement: supp_M110.139345_jbc.M110.139345-1.pdf [file supp_M110.139345_jbc.M110.139345-1.pdf]

**Supplementary Figure 1** Chen *et al.*

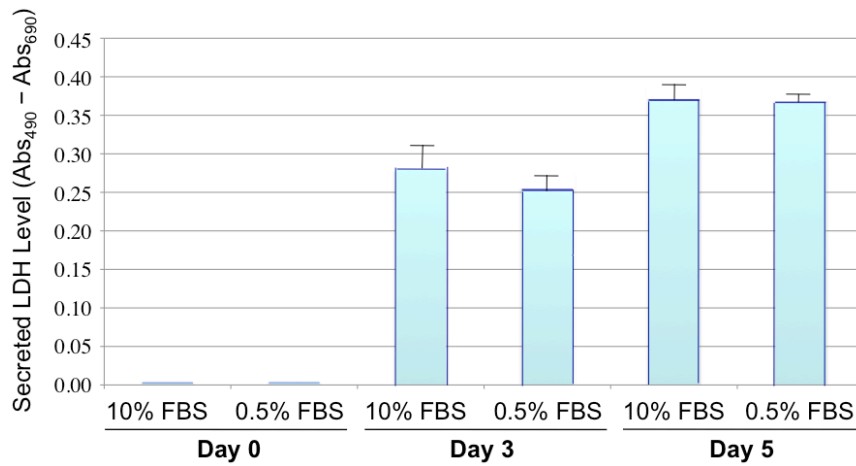

Supplementary Fig. 1. HCT-8 cells were cultivated in 10% or 0.5% FCS-containing RPMI medium for 3 or 5 days. The media were collected, centrifuged, and filtered through 0.45- $\mu$ m filters (Millipore). The filtered media were used for the lactate dehydrogenase activity assay according to the manufacturer's instructions (Sigma). The data are the mean  $\pm$  SD of three independent experiments. Each experiment was performed in triplicate.
