# Supplementary material
Source: PubMed Central journal article supplement (PMC2919109)
Supplement: supp_M110.139345_jbc.M110.139345-2.pdf [file supp_M110.139345_jbc.M110.139345-2.pdf]

**Supplementary Figure 2** Chen *et al.*

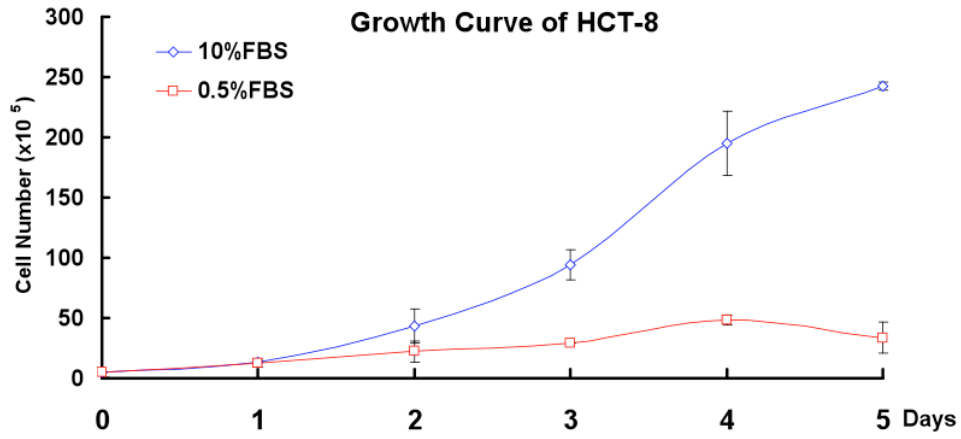

Supplementary Fig. 2. HCT-8 cells were cultivated in 10% or 0.5% FCS-containing RPMI medium for indicated days. The numbers of living cells were determined by Trypan blue exclusion assay. The data are the mean  $\pm$  SD of three independent experiments. Each experiment was performed in triplicate.
