# Supplementary material
Source: PubMed Central journal article supplement (PMC2919109)
Supplement: supp_M110.139345_jbc.M110.139345-3.pdf [file supp_M110.139345_jbc.M110.139345-3.pdf]

**Supplementary Figure 3** Chen *et al.*

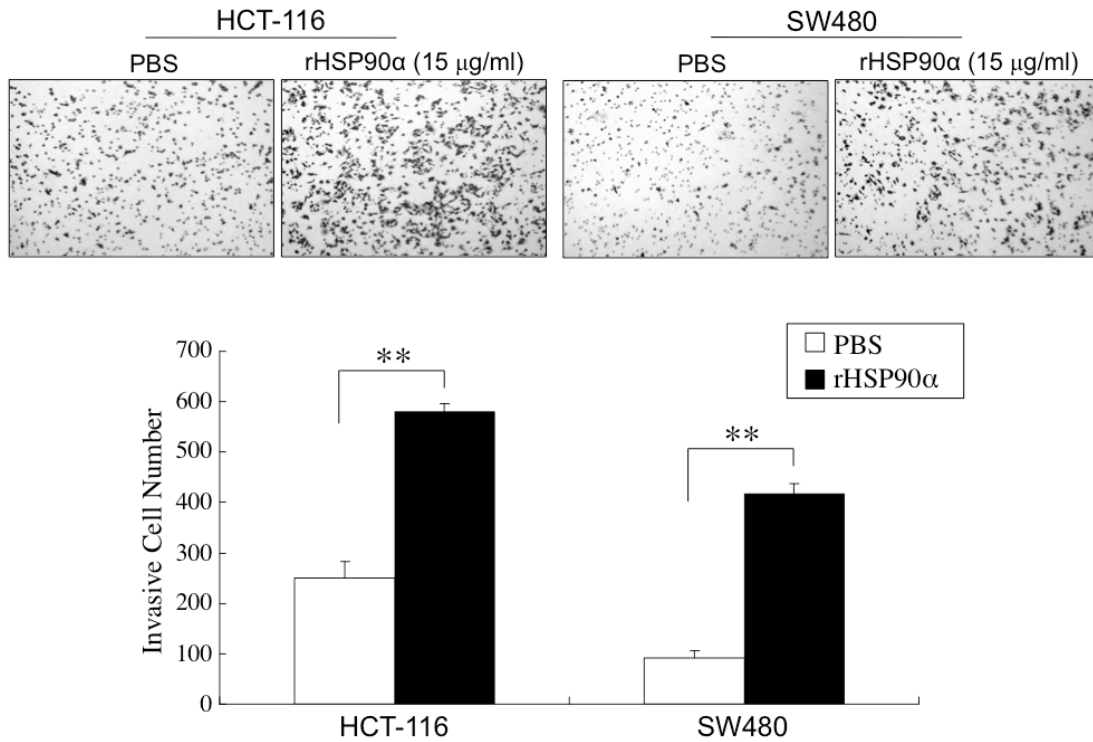

Supplementary Fig. 3. Human colorectal cancer HCT-116 and SW480 cells, mixed with serum-free RPMI medium plus 15 μg/ml of rHSP90α, were seeded in the top chambers of the Transwell inserts. Cells were allowed to invade for 16 h through Matrigel toward RPMI medium supplemented with 10% FBS in the bottom chambers. The filters of Transwell inserts were then fixed and stained with Giemsa, and pictures were taken of the invasive cells on the filters (upper panel) and counted by Image-Pro Plus software (bottom panel). The data are the mean ± SD of three independent experiments. \*\* $P < 0.01$ .
